# Supplementary material
Source: publisher figshare collection journal article supplement (https://sage.figshare.com/ndownloader/files/22331169)
Supplement: Supplementary file 1 [file 22331169]

Supplemental material for “Outcomes of clinical ethics support near the end of life. A systematic review of qualitative and survey studies and qualitative research in Clinical ethics support services near end of life. Systematic Review” - Critical aAppraisal

**Fig. 1 Critical Appraisal of Quantitative Studies**

|                   | Clear question | Appropriate design | Clear sampling? | Selection bias possible | Representative sample | Power analysis | Satisfactory response rate | Valid and reliable questionnaire | Confidence Intervals given | Other bias |
|-------------------|----------------|--------------------|-----------------|-------------------------|-----------------------|----------------|----------------------------|----------------------------------|----------------------------|------------|
| Cohn 2007         | +              | +                  | +               | +                       | ?                     | ?              | +                          | ?                                | -                          | +          |
| DuVal 2004        | +              | +                  | +               | -                       | +                     | ?              | +                          | ?                                | -                          | +          |
| Kalager 2011      | +              | +                  | +               | +                       | ?                     | ?              | ?                          | ?                                | -                          | -          |
| LaPuma 1988       | +              | +                  | +               | -                       | ?                     | ?              | ?                          | ?                                | -                          | -          |
| LaPuma 1992       | +              | +                  | +               | -                       | ?                     | ?              | +                          | ?                                | -                          | ?          |
| McClung 1996      | +              | +                  | +               | -                       | ?                     | ?              | +                          | ?                                | -                          | +          |
| Orr 1996          | +              | +                  | +               | +                       | ?                     | ?              | +                          | ?                                | -                          | -          |
| Perkins 1988      | +              | +                  | +               | -                       | ?                     | ?              | +                          | ?                                | -                          | +          |
| Schneiderman 2006 | +              | +                  | +               | +                       | ?                     | ?              | +                          | ?                                | -                          | +          |
| White 1993        | +              | +                  | +               | -                       | ?                     | ?              | +                          | ?                                | -                          | +          |

**Fig. 2** Critical Appraisal of Qualitative Studies

|                   | Congruity philosophy - methodology | Congruity methodology - objectives | Congruity methodology - data collection | Congruity methodology - analysis of data | Congruity methodology - interpretation of results | Theoretical & cultural location of researcher | Influence of researcher on research | Adequate participant representation | Conclusions grounded in data |
|-------------------|------------------------------------|------------------------------------|-----------------------------------------|------------------------------------------|---------------------------------------------------|-----------------------------------------------|-------------------------------------|-------------------------------------|------------------------------|
| Kelly 1997        | +                                  | +                                  | +                                       | +                                        | +                                                 | -                                             | -                                   | +                                   | ?                            |
| Orr 1996          | ?                                  | ?                                  | ?                                       | ?                                        | ?                                                 | -                                             | -                                   | ?                                   | -                            |
| Shippee-Rice 1990 | +                                  | +                                  | +                                       | -                                        | +                                                 | +                                             | +                                   | +                                   | +                            |
| Svantesson 2008   | ?                                  | +                                  | +                                       | +                                        | +                                                 | -                                             | -                                   | +                                   | +                            |
